# Supplementary material
Source: PubMed Central journal article supplement (PMC6965560)
Supplement: 13280_2019_1224_MOESM1_ESM.pdf [file 13280_2019_1224_MOESM1_ESM.pdf]

**Ambio**

Electronic Supplementary Material

*This supplementary material has not been peer reviewed.*

Title: **Partnering with cattle ranchers for large-scale restoration**

Author: Alicia Calle

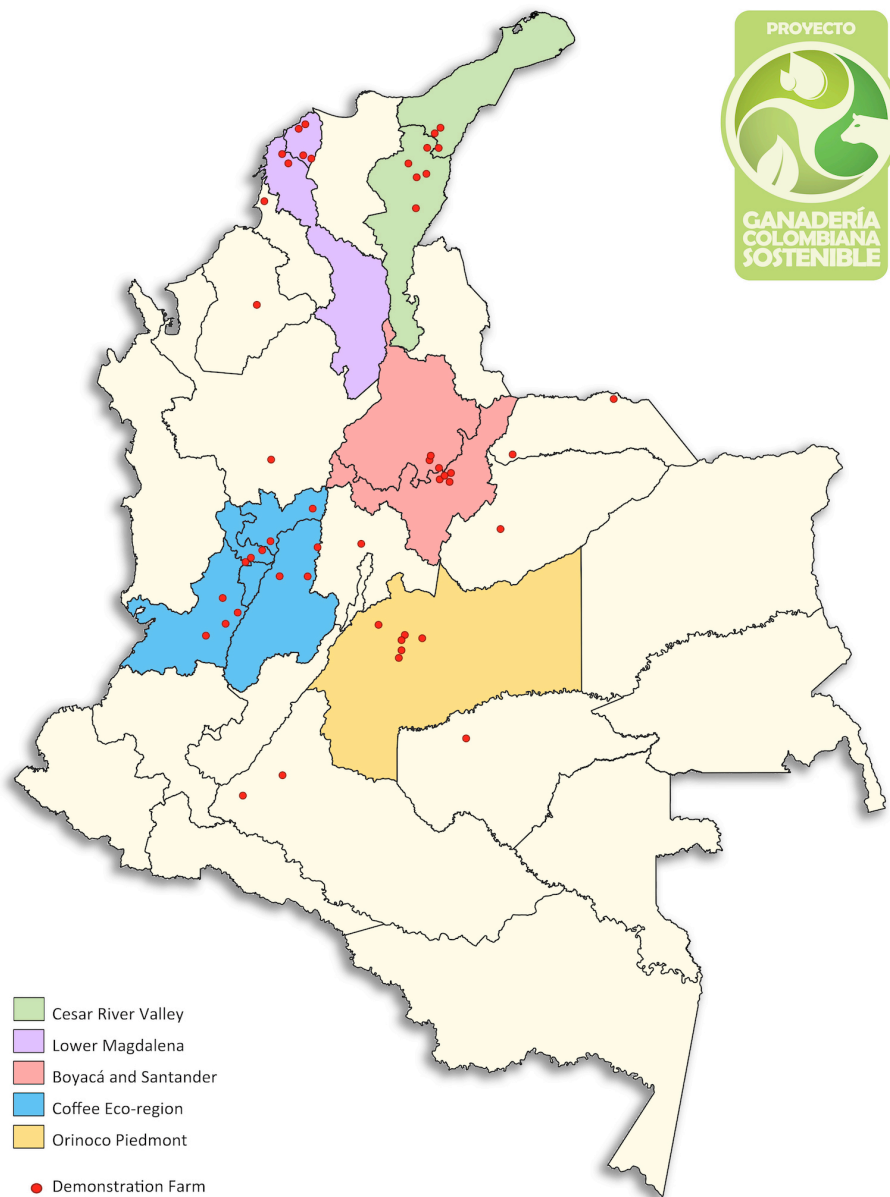

**Figure S1.**

MSCR project sites and demonstration farms. MSCR currently reaches 2900+ cattle ranchers and spans 87 municipalities in 12 states across five ecologically diverse regions of Colombia. A network of 50 silvopastoral demonstration farms (red dots) has been established to facilitate the diffusion and adoption of silvopastoral systems nationwide.

**Table S1.**

Characteristics of the ranchers and the farms represented in the rancher and extension agent surveys (n = 90 ranchers, 101 extension agents). Extension agents' numbers refer to the number of ranchers they serve. For (c), extension agents provided an estimates break-up of the farms they serve as small, medium or large, but the definition of these categories varies by region; for example, a 20-hectare farm is considered large in Boyacá but small in the Caribbean region.

|                                                            | Ranchers      | Extension agents |                |
|------------------------------------------------------------|---------------|------------------|----------------|
| <b>a. Region</b>                                           |               |                  |                |
| Orinoco piedmont                                           | 53%           | 19%              |                |
| Amazon piedmont                                            | 16%           | 2%               |                |
| Boyacá-Santander                                           | 13%           | 21%              |                |
| Coffee Ecoregion-Andes                                     | 12%           | 22%              |                |
| Caribbean                                                  | 6%            | 33%              |                |
| Other                                                      | 0%            | 4%               |                |
| <b>b. Ranchers' age and gender</b>                         |               |                  |                |
| Under 40: 40-60: Over 60                                   | 24%: 49%: 27% | 14%: 67%: 19%    |                |
| Male: Female                                               | 72: 28%       | 25: 25%          |                |
| <b>c. Farm size in hectares</b> (mean = 48.7, median = 20) |               |                  |                |
| 1-10                                                       | 20%           | Small: 61%       |                |
| 11-50                                                      | 54%           | Medium: 32%      |                |
| 51-100                                                     | 15%           | Large: 7%        |                |
| ≥ 100                                                      | 11%           |                  |                |
| <b>d. Productive activities on the farm</b>                |               |                  |                |
| Cattle: 100%                                               | Crops: 43%    | Other: 21%       |                |
| <b>e. Years of experience with silvopastoral systems</b>   |               |                  |                |
| Less than 2: 33%                                           | 2-5: 52%      | 6-10: 7%         | 10 or more: 8% |

**Table S2.**

$\chi^2$  test values comparing ranchers' and extension agents' perceptions on motivations for the adoption of conservation practices.

| <b>Motivations</b>                                               | $\chi^2$ | P      |
|------------------------------------------------------------------|----------|--------|
| <b>a. For the adoption of silvopastoral practices</b>            |          |        |
| Improve productivity                                             | 0.046    | 0.830  |
| Protect the environment                                          | 2.551    | 0.110  |
| Access technical assistance                                      | 2.731    | 0.098  |
| Recover soil fertility                                           | 9.363    | 0.002* |
| Increase profitability                                           | 2.327    | 0.127  |
| Produce more sustainably                                         | 3.303    | 0.069  |
| Bequeath better farm to heirs                                    | 5.135    | 0.023* |
| Reduce input costs                                               | 0.065    | 0.799  |
| Inspired by demonstration farm                                   | 1.838    | 0.175  |
| PES or monetary incentive                                        | 46.880   | 0.000* |
| <b>b. For planting trees in pastures, corridors, live fences</b> |          |        |
| Shade for animal comfort                                         | 2.128    | 0.145  |
| Improve fodder quality/quantity                                  | 0.452    | 0.501  |
| Protect the environment                                          | 1.087    | 0.297  |
| Attract beneficial organisms                                     | 13.087   | 0.000* |
| Protect or improve soils                                         | 0.172    | 0.678  |
| Improve farm aesthetics                                          | 0.191    | 0.662  |
| Firewood, timber, fruit, etc.                                    | 0.486    | 0.485  |
| Protect water sources                                            | 2.568    | 0.109  |
| <b>c. For protecting forests</b>                                 |          |        |
| Conserve wildlife                                                | 16.375   | 0.000* |
| Protect water quality/quantity                                   | 1.806    | 0.179  |
| Protect the environment                                          | 0.529    | 0.467  |
| PES or monetary incentive                                        | 22.809   | 0.000* |
| Avoid penalties                                                  | 0.413    | 0.520  |
| <b>d. For protecting riparian forests</b>                        |          |        |
| Protect water quantity                                           | 0.006    | 0.938  |
| Protect water quality                                            | 0.024    | 0.877  |
| Protect the environment                                          | 1.292    | 0.256  |
| Conserve wildlife                                                | 4.887    | 0.027* |
| Improve farm aesthetics                                          | 1.429    | 0.232  |
| Prevent soil erosion                                             | 1.194    | 0.275  |
| Connect forest fragments                                         | 0.431    | 0.511  |
| PES or monetary incentive                                        | 31.544   | 0.000* |

\* Significant differences between ranchers and extension agents ( $\chi^2$ ,  $P < 0.05$ )

**Table S3.**

Ranchers' assessment of value statements related to the environment (n = 67-87 ranchers, 92-97 extension agents). For extension agents, numbers indicate estimated percent of their ranchers who they think would agree with the statement.

| <b>Value statements</b>                                         | <b>Ranchers</b> |                |                 |
|-----------------------------------------------------------------|-----------------|----------------|-----------------|
|                                                                 | <b>Agree</b>    | <b>Neutral</b> | <b>Disagree</b> |
| As a farmer, environmental protection is my responsibility      | 100%            | 0%             | 0%              |
| The farm is more valuable with protected streams/forests        | 95%             | 2%             | 2%              |
| Without payment, I see no reason to protect the environment     | 1%              | 2%             | 96%             |
| Environmental protection has high costs but few benefits        | 18%             | 13%            | 69%             |
| If I want more production I cannot worry about the environment  | 15%             | 15%            | 71%             |
| The land produces more when the environment is conserved        | 97%             | 2%             | 0%              |
| Trees provide direct benefits for production                    | 100%            | 0%             | 0%              |
| The farm looks better with more trees                           | 97%             | 2%             | 1%              |
| Sustainable farm management reflects on better animal health    | 99%             | 1%             | 0%              |
| One can produce cattle without damaging the environment         | 87%             | 8%             | 5%              |
| As a farmer, I have no control over soil degradation            | 15%             | 1%             | 84%             |
| Excessive use of agrochemicals can harm the environment         | 95%             | 1%             | 4%              |
| I feel proud of my peasant heritage                             | 96%             | 4%             | 0%              |
| I feel a strong emotional tie to my land                        | 89%             | 9%             | 1%              |
| Sustainable farm management fits our family project             | 93%             | 6%             | 1%              |
| I worry about generational relay on my farm                     | 47%             | 22%            | 31%             |
| I take care of my land for the enjoyment of future generations  | 98%             | 1%             | 1%              |
| I do not plant trees because I will not be here to harvest them | 2%              | 2%             | 95%             |
| I make decisions about the farm thinking long-term              | 90%             | 7%             | 3%              |

  

| <b>Value statements</b>                                        | <b>Extension agents</b> |              |                 |
|----------------------------------------------------------------|-------------------------|--------------|-----------------|
|                                                                | <b>&gt; 50%</b>         | <b>~ 50%</b> | <b>&lt; 50%</b> |
| I want to reduce my farm's environmental impact                | 79%                     | 18%          | 4%              |
| My farm has more value when it has protected streams/forests   | 83%                     | 96%          | 7%              |
| If I protect the environment, I should receive a payment       | 80%                     | 8%           | 12%             |
| Environmental protection has high costs but few benefits       | 27%                     | 17%          | 55%             |
| If I want to produce more I cannot worry about the environment | 24%                     | 27%          | 50%             |
| Land produces more when the environment is conserved           | 80%                     | 15%          | 5%              |
| Trees provide direct benefits for production                   | 91%                     | 8%           | 1%              |
| The farm looks better with more trees                          | 89%                     | 7%           | 4%              |
| I understand the environmental impact of cattle production     | 78%                     | 16%          | 6%              |
| As a farmer, I have no control over soil degradation           | 33%                     | 25%          | 42%             |
| I want to reduce use of agrochemicals                          | 71%                     | 21%          | 8%              |
| I feel a strong emotional tie to my land                       | 87%                     | 12%          | 2%              |
| I worry about generational relay on my farm                    | 64%                     | 19%          | 19%             |
| I don't plant trees because I won't be here to harvest them    | 11%                     | 14%          | 76%             |
| I make decisions about the farm thinking long-term             | 62%                     | 23%          | 15%             |

**Table S4.**  $\chi^2$  test values comparing ranchers' and extension agents' perceptions on barriers and incentives for the adoption of conservation practices.

|                                                              | $\chi^2$ | P      |
|--------------------------------------------------------------|----------|--------|
| <b>Incentives for the adoption of conservation practices</b> |          |        |
| High input costs                                             | 0.114    | 0.735  |
| Labor shortage                                               | 4.152    | 0.042* |
| Maintenance requirement                                      | 1.830    | 0.176  |
| High tree mortality rate                                     | 3.435    | 0.064  |
| Lack of technical assistance                                 | 1.029    | 0.310  |
| Interference with pastures                                   | 2.857    | 0.091  |
| Fear of fines or permits                                     | 14.244   | 0.000* |
| <b>Barriers for the adoption of conservation practices</b>   |          |        |
| In-kind donations                                            | 0.119    | 0.730  |
| Tree maintenance after planting                              | 5.666    | 0.017* |
| Property tax breaks                                          | 0.000    | 0.996  |
| PES or monetary incentive                                    | 24.379   | 0.000* |
| Continued technical assistance                               | 0.208    | 0.649  |
| Fence maintenance after planting                             | 9.388    | 0.002* |
| Premium market prices                                        | 1.605    | 0.205  |

\* Significant differences between ranchers and extension agents ( $\chi^2$ ,  $P < 0.05$ )

**Appendix 1.**  
**Survey questions**

**Environmental Protection in Cattle Farms  
Cattle Rancher Survey**

**Instructions:**

Please answer the questions according to **your own experience**. If there is a question you do not want to answer, leave it blank. Your answers are confidential and anonymous, and will be used only for research purposes.

**Section A.**

**Rancher and farm information**

- A1.** Farm location (municipality and state): \_\_\_\_\_
- A2.** Farm size (approximate): \_\_\_\_\_ hectares
- A3.** Productive activities practiced on the farm  
 Cattle ranching     Agriculture     Agro-tourism     Other \_\_\_\_\_
- A4.** Your relation to the farm:     Owner     Administrator     Heir
- A5.** Farm origin:  
 Acquired by current owner     Family property from previous generations
- A6.** Age:     < 30     30-39     40-49     50-59     > 60
- A7.** Gender:     Female     Male

**Section B.**

**Sustainable productive systems**

- B1.** Your farm is:  
 Ganadería Colombiana Sostenible Project farm     Demonstration farm  
 None of the above
- B2.** How long since you started implementing sustainable ranching practices? \_\_\_\_\_
- B3.** What were your/your family's **motivations** to take interest in the adoption of sustainable ranching practices? (*Check all that apply*)
- |                                                              |                                                             |
|--------------------------------------------------------------|-------------------------------------------------------------|
| <input type="checkbox"/> Improve productivity                | <input type="checkbox"/> Access to technical assistance     |
| <input type="checkbox"/> Reduce cost of input purchase       | <input type="checkbox"/> Produce in a more sustainable way  |
| <input type="checkbox"/> Improve profitability of the system | <input type="checkbox"/> Improve food security              |
| <input type="checkbox"/> Recover soil fertility              | <input type="checkbox"/> Leave a better farm for my heirs   |
| <input type="checkbox"/> Recover the micro-catchment         | <input type="checkbox"/> Visited a demonstration farm       |
| <input type="checkbox"/> Receive an economic incentive       | <input type="checkbox"/> Protect or improve the environment |
- Other: \_\_\_\_\_



**B4.** Which of the following systems **have you implemented** on your farm to date?

- Live fences
  Pasture division for rotation  
 Fodder bank
  Scattered trees in pastures  
 Fodder hedgerow
  Intensive silvopastoral system

Other: \_\_\_\_\_

**B5.** Which of the following has changed in your farm after implementing the systems?

| Change                                 | Increase                 | Decrease                 | No change                |
|----------------------------------------|--------------------------|--------------------------|--------------------------|
| Use of external inputs                 | <input type="checkbox"/> | <input type="checkbox"/> | <input type="checkbox"/> |
| Cattle health or body condition        | <input type="checkbox"/> | <input type="checkbox"/> | <input type="checkbox"/> |
| Fodder and pasture quality or quantity | <input type="checkbox"/> | <input type="checkbox"/> | <input type="checkbox"/> |
| Production stability                   | <input type="checkbox"/> | <input type="checkbox"/> | <input type="checkbox"/> |
| Presence or birds or wildlife          | <input type="checkbox"/> | <input type="checkbox"/> | <input type="checkbox"/> |

**B6.** How satisfied are you with the **results** obtained to date?

- Very satisfied
  Satisfied
  Neutral
  Unsatisfied
  Very unsatisfied

### Section C.

#### Environmental protection actions

**C1.** Has your farm previously participated in **another program or project** focused on the following issues? *(Check all that apply)*

- Fencing and protection of micro-catchment
  Native or timber-tree planting  
 Riparian corridor reforestation
  Rehabilitation of eroded areas  
 Forest protection

**C2.** Which of the following **exist** on your farm today?

- Spring, stream or wetland
  Riparian corridor  
 Forest fragment
  Landslide or eroded area

**C3.** Are you **currently** doing any of the following on your farm?

| Action                                               | Yes                      | No                       | No but I'd like to       | Not apply                |
|------------------------------------------------------|--------------------------|--------------------------|--------------------------|--------------------------|
| Protecting or recovering a forest fragment           | <input type="checkbox"/> | <input type="checkbox"/> | <input type="checkbox"/> | <input type="checkbox"/> |
| Protecting or reforesting a riparian corridor        | <input type="checkbox"/> | <input type="checkbox"/> | <input type="checkbox"/> | <input type="checkbox"/> |
| Planting trees in pastures, corridors or live fences | <input type="checkbox"/> | <input type="checkbox"/> | <input type="checkbox"/> | <input type="checkbox"/> |
| Restricting cattle access to water sources           | <input type="checkbox"/> | <input type="checkbox"/> | <input type="checkbox"/> | <input type="checkbox"/> |
| Protecting and managing natural regeneration         | <input type="checkbox"/> | <input type="checkbox"/> | <input type="checkbox"/> | <input type="checkbox"/> |
| Reducing use of agrochemical inputs                  | <input type="checkbox"/> | <input type="checkbox"/> | <input type="checkbox"/> | <input type="checkbox"/> |

**C4.** If you are **protecting or recovering forest fragments**, what are your motivations? *(Check all that apply)*

- |                                                           |                                                         |
|-----------------------------------------------------------|---------------------------------------------------------|
| <input type="checkbox"/> Protect water quality /quantity  | <input type="checkbox"/> Receive and economic incentive |
| <input type="checkbox"/> Conserve plants and wild animals | <input type="checkbox"/> Improve touristic amenities    |
| <input type="checkbox"/> Protect the environment          | <input type="checkbox"/> Avoid penalty fees             |

Other: \_\_\_\_\_

**C5.** If you are **protecting o reforesting riparian corridors**, what are your motivations? *(Check all that apply)*

- |                                                                   |                                                            |
|-------------------------------------------------------------------|------------------------------------------------------------|
| <input type="checkbox"/> Protect or recover water <b>quantity</b> | <input type="checkbox"/> Receive payment for conservation  |
| <input type="checkbox"/> Protect water <b>quality</b>             | <input type="checkbox"/> Protect forest plants and animals |
| <input type="checkbox"/> Prevent soil erosion                     | <input type="checkbox"/> Connect forest fragments          |
| <input type="checkbox"/> Beautify the farm                        | <input type="checkbox"/> Protect the environment           |

Other: \_\_\_\_\_

**C6.** If you are **planting trees** in pastures, corridors or live fences, what are your motivations? *(Check all that apply)*

- |                                                                       |                                                      |
|-----------------------------------------------------------------------|------------------------------------------------------|
| <input type="checkbox"/> Provide shade to improve animal welfare      | <input type="checkbox"/> Protect water sources       |
| <input type="checkbox"/> Improve fodder quality/quantity              | <input type="checkbox"/> Protect o improve the soils |
| <input type="checkbox"/> Harvest fruit, firewood, timber, others      | <input type="checkbox"/> Beautify the farm           |
| <input type="checkbox"/> Attract beneficial insects, birds or animals | <input type="checkbox"/> Protect the environment     |

Other: \_\_\_\_\_

**C7.** If you are planting or planning to plant trees, what **type of trees** do you prefer? *(Check all that apply)*

- |                                             |                                                       |
|---------------------------------------------|-------------------------------------------------------|
| <input type="checkbox"/> Fast growing trees | <input type="checkbox"/> Trees with beautiful flowers |
| <input type="checkbox"/> Fruit trees        | <input type="checkbox"/> Nitrogen fixing trees        |
| <input type="checkbox"/> Timber trees       | <input type="checkbox"/> Shade trees                  |
| <input type="checkbox"/> Native trees       | <input type="checkbox"/> Trees that attract wildlife  |

Other: \_\_\_\_\_

**C8.** What are the main factors **preventing** you from implementing more environmental protection actions on your farm? *(Check all that apply)*

- |                                                                  |                                                           |
|------------------------------------------------------------------|-----------------------------------------------------------|
| <input type="checkbox"/> High cost of inputs (trees, wire, etc.) | <input type="checkbox"/> Interference with production     |
| <input type="checkbox"/> High maintenance requirements           | <input type="checkbox"/> Lack of knowledge or information |
| <input type="checkbox"/> High tree mortality                     | <input type="checkbox"/> Lack of technical assistance     |
| <input type="checkbox"/> Labor shortages                         | <input type="checkbox"/> Not important to me              |

Other: \_\_\_\_\_

**C9.** Which of the following **incentives** would motivate you to implement more environmental protection actions on your farm?

- In-kind donations (trees, wire, fertilizer, labor, etc)
- Payments for ecosystem services (water, carbon, biodiversity, etc)
- Help with tree maintenance after planting
- Help with fence maintenance once installed
- More technical assistance
- Better market prices for sustainable production
- Tax breaks

Other: \_\_\_\_\_

**C10.** For each of the following statements, indicate your level of **agreement or disagreement**:

**1** = agree   **2** = neither agree nor disagree   **3** = disagree

|                                                                            | <b>Agreement</b> |   |   |
|----------------------------------------------------------------------------|------------------|---|---|
|                                                                            | 1                | 2 | 3 |
| The farm looks more beautiful with more trees                              | 1                | 2 | 3 |
| I want to take care of my land for the enjoyment of future generations     | 1                | 2 | 3 |
| If I want to produce more, I cannot worry about protecting the environment | 1                | 2 | 3 |
| I feel a deep emotional connection to my land                              | 1                | 2 | 3 |
| As a farmer I cannot prevent the deterioration of the soils                | 1                | 2 | 3 |
| Trees generate direct benefits for production                              | 1                | 2 | 3 |
| Sustainable management is reflected in the bodily condition of the animals | 1                | 2 | 3 |
| Protecting the environment generates many costs and few benefits           | 1                | 2 | 3 |
| The farm is worth more if the streams and forests are protected            | 1                | 2 | 3 |
| I don't plant trees because I won't be here to harvest them                | 1                | 2 | 3 |
| Using agrochemical inputs can harm the environment                         | 1                | 2 | 3 |
| It is my responsibility as a farmer to protect the environment             | 1                | 2 | 3 |
| Sustainable management of the farm is part of the family project           | 1                | 2 | 3 |
| The land produces more when the environment is protected                   | 1                | 2 | 3 |
| I feel proud of my rural heritage                                          | 1                | 2 | 3 |
| If I am not paid, I do not see a reason to protect the environment         | 1                | 2 | 3 |
| Cattle ranching can be done without a negative impact on the environment   | 1                | 2 | 3 |
| I think long-term when making decisions about the farm                     | 1                | 2 | 3 |
| I am worried about generational relay in my farm                           | 1                | 2 | 3 |

**Section D.**

**Climate change**

**D1.** Have you perceived **changes in the weather** of your region in recent years?

- Yes  No (If you replied **No**, go to Section E)

**D2.** If you replied Yes, **what kind of changes** have you perceived? (Check all that apply)

- Higher than normal temperatures  Lower than normal temperatures  
 Shorter than normal rainy season  Longer than normal rainy season  
 Shorter than normal dry season  Longer than normal dry season  
 More intense or torrential rains  More severe droughts  
 Increasingly unpredictable weather

Other: \_\_\_\_\_

**D3.** What type of **effect** do you think these changes will have on your productive activity?

- Very positive  Somewhat positive  Neutral  Somewhat negative  Very negative

**D4.** Do you believe the changes you are implementing can help you **face the effects** of these changes in weather? *Explain*

\_\_\_\_\_  
\_\_\_\_\_

**Section E.**

**Technical assistance and capacity building**

**E1.** Have you received any type of technical assistance and/or capacity building to implement these changes on your farm?

- Yes, by the Proyecto Ganadería Colombiana Sostenible  
 Yes, by another cattle ranching project  
 Yes, by CIPAV  
 Yes, by another organization  
 I have not received technical assistance or capacity building (If your answer is **No**, end here)

**E2.** How much **technical assistance and information** have you received on the following topics?

| <b>Topic</b>                                     | <b>Much</b>              | <b>Some</b>              | <b>Very little</b>       | <b>None</b>              |
|--------------------------------------------------|--------------------------|--------------------------|--------------------------|--------------------------|
| Productive systems (pastures, hedges, intensive) | <input type="checkbox"/> | <input type="checkbox"/> | <input type="checkbox"/> | <input type="checkbox"/> |
| Animal health and management                     | <input type="checkbox"/> | <input type="checkbox"/> | <input type="checkbox"/> | <input type="checkbox"/> |
| Planting and maintenance of trees in pastures    | <input type="checkbox"/> | <input type="checkbox"/> | <input type="checkbox"/> | <input type="checkbox"/> |
| Management of natural regeneration               | <input type="checkbox"/> | <input type="checkbox"/> | <input type="checkbox"/> | <input type="checkbox"/> |
| Watershed protection                             | <input type="checkbox"/> | <input type="checkbox"/> | <input type="checkbox"/> | <input type="checkbox"/> |
| Environmental impact of cattle                   | <input type="checkbox"/> | <input type="checkbox"/> | <input type="checkbox"/> | <input type="checkbox"/> |

**E3.** How much **importance** have your extension agents assigned to the following topics related to environmental protection?

| <b>Action</b>                               | <b>Much</b>              | <b>Some</b>              | <b>Very little</b>       | <b>None</b>              |
|---------------------------------------------|--------------------------|--------------------------|--------------------------|--------------------------|
| Protecting or recovering forest fragments   | <input type="checkbox"/> | <input type="checkbox"/> | <input type="checkbox"/> | <input type="checkbox"/> |
| Protecting or recovering riparian corridors | <input type="checkbox"/> | <input type="checkbox"/> | <input type="checkbox"/> | <input type="checkbox"/> |
| Increasing tree cover on the landscape      | <input type="checkbox"/> | <input type="checkbox"/> | <input type="checkbox"/> | <input type="checkbox"/> |
| Planting native trees if possible           | <input type="checkbox"/> | <input type="checkbox"/> | <input type="checkbox"/> | <input type="checkbox"/> |
| Protecting or recovering the soil           | <input type="checkbox"/> | <input type="checkbox"/> | <input type="checkbox"/> | <input type="checkbox"/> |
| Protecting native plants and wildlife       | <input type="checkbox"/> | <input type="checkbox"/> | <input type="checkbox"/> | <input type="checkbox"/> |
| Reducing the use of agrochemical inputs     | <input type="checkbox"/> | <input type="checkbox"/> | <input type="checkbox"/> | <input type="checkbox"/> |

**E4.** How often do you follow the **recommendations** provided by the extension agents who visit you?

- Always             Frequently             Sometimes             Rarely

**E5.** How satisfied are you with the **quantity and quality** of technical assistance you have received?

- Very satisfied             Satisfied             Neutral             Unsatisfied             Very unsatisfied

**Thanks for your time and participation!**

If you have additional comments, please provide them here:

---

---

---

---

---

---

---

---

**Environmental Protection in Cattle Farms  
Survey for Technical Staff in the Proyecto Ganadería Colombiana Sostenible**

**Instructions:**

Please answer the questions according to **your own experience**. If there is a question you do not want to answer, leave it blank. Your answers are confidential and anonymous, and will be used only for research purposes.

**Section A.**

**Information about the extension agent**

**A1.** Your current position in the Ganadería Colombiana Sostenible Project (or other project):

\_\_\_\_\_

**A2.** Time working with the Project: \_\_\_\_\_

**A3.** Within the Project, you work for:  FEDEGAN       CIPAV

**A4.** Before this Project, did you have any experience working with sustainable cattle ranching?  
 Yes               No

**A5.** What is your technical or professional background? \_\_\_\_\_

**A6.** In one sentence, how would you explaining this Project to someone who knows nothing about it?

\_\_\_\_\_  
\_\_\_\_\_  
\_\_\_\_\_

**A7.** Gender:  Female       Male

**A8.** Age:       20-29       30-39       40-49       Over 50

**Section B.**

**State of the landscape in your work region**

**B1.** Project region where you work: \_\_\_\_\_

**B2.** Municipalities of the farms assigned to you: \_\_\_\_\_

**B3.** Select the options that best describe the general landscape(s) where you work:

**Land use:**               Pasture               Cropland               Pasture and cropland       Other

**Deforestation:**       Less than 40%       40–70%               70–100%

**Erosion:**               Light                   Moderate               Severe

- Forest fragments:**       Many, large and conserved  
 Many, medium sized and conserved  
 Many, medium sized and disturbed  
 Few, medium sized and disturbed  
 Few, small and disturbed  
 Almost none left
- Live fences and trees in pastures:**  Very common       Somewhat common       Uncommon
- Connectivity:**       High       Intermediate       Low

**Section C.**

**Information about the ranchers**

**B1.** Total number of farms or ranchers under your responsibility: \_\_\_\_\_

**B2.** Approximately **what percentage** of your ranchers are:

- Male: \_\_\_\_\_ %      Female: \_\_\_\_\_ %
- Under 40 years: \_\_\_\_\_ %      40–60 years: \_\_\_\_\_ %      Over 60 years: \_\_\_\_\_ %
- Small: \_\_\_\_\_ %      Medium: \_\_\_\_\_ %      Large: \_\_\_\_\_ %
- Subsistence farmers: \_\_\_\_\_ %      Commercial farmers: \_\_\_\_\_ %
- *Campesino* farmers: \_\_\_\_\_ %      City farmers: \_\_\_\_\_ %

**B3.** Approximately **what percentage** of your ranchers would you describe as:

- Very interested and actively engaging: \_\_\_\_\_ %
- Interested, but engaging less than they would like to: \_\_\_\_\_ %
- Somewhat interested, and only partly engaged: \_\_\_\_\_ %
- Not interested and not engaged: \_\_\_\_\_ %

**B3.** In your experience, what were the main **motivations** your ranchers had **to participate** in this Project? (*Check all that apply*)

- |                                                              |                                                                      |
|--------------------------------------------------------------|----------------------------------------------------------------------|
| <input type="checkbox"/> Improve farm productivity           | <input type="checkbox"/> Improve the environment                     |
| <input type="checkbox"/> Improve profitability of the system | <input type="checkbox"/> Leave a better farm to their heirs          |
| <input type="checkbox"/> Reduce cost of input purchase       | <input type="checkbox"/> Receive an economic incentive               |
| <input type="checkbox"/> Access to technical assistance      | <input type="checkbox"/> Visited a demonstration farm                |
| <input type="checkbox"/> Recover soil fertility              | <input type="checkbox"/> Referred by friend or relative              |
| <input type="checkbox"/> Produce in a more sustainable way   | <input type="checkbox"/> Positive experience with a previous project |

Other: \_\_\_\_\_

**B3.** Which of these systems have the **highest acceptance** among your ranchers?

- |                                           |                                                         |
|-------------------------------------------|---------------------------------------------------------|
| <input type="checkbox"/> Pasture division | <input type="checkbox"/> Live fences                    |
| <input type="checkbox"/> Fodder bank      | <input type="checkbox"/> Scattered trees in pastures    |
| <input type="checkbox"/> Fodder hedgerow  | <input type="checkbox"/> Intensive silvopastoral system |

**Section C.**

**Environmental protection**

Answer the following questions considering **only** those ranchers who are in some way **actively interested** and/or engaged in the Project.

**C1.** What proportion of your ranchers do you think would be interested in or willing to implement the following environmental protection actions?

**A** = most      **B** = more than half      **C** = half      **D** = less than half      **E** = very few

| Environmental protection action                    | Interested ranchers |   |   |   |   |
|----------------------------------------------------|---------------------|---|---|---|---|
|                                                    | A                   | B | C | D | E |
| Protect forest fragments                           | A                   | B | C | D | E |
| Protect or reforest riparian corridors             | A                   | B | C | D | E |
| Plant trees in pastures and live fences            | A                   | B | C | D | E |
| Reforest steep or severely eroded areas            | A                   | B | C | D | E |
| Prevent cattle from direct access to water sources | A                   | B | C | D | E |
| Protect and manage natural regeneration            | A                   | B | C | D | E |
| Reduce the use of agrochemical inputs              | A                   | B | C | D | E |

**C2.** In your experience, what are ranchers' main **motivations** to protect the forest fragments? *(Check all that apply)*

- Protect water quality and/or quantity       Receive an economic incentive
- Conserve wild plants and animals       Avoid penalty fees
- Protect the environment       Have enough land

Other: \_\_\_\_\_

**C3.** In your experience, what are ranchers' main **motivations** to protect or reforest **riparian corridors**? *(Check all that apply)*

- Protect or recover water quantity       Receive payment for conservation
- Protect water quality       Conserve wild plants and animals
- Prevent soil erosion       Connect forest fragments
- Beautify the farm       Protect the environment

Other: \_\_\_\_\_

**C4.** In your experience, which are ranchers' main **motivations** to plant trees in pastures or live fences? *(Check all that apply)*

- Provide shade for animal welfare       Improve fodder quality/quantity
- Harvest fruit, firewood, timber, other       Attract beneficial insects, birds or animals
- Protect water sources       Protect or improve the soils
- Beautify the farm       Protect the environment

Other: \_\_\_\_\_



**C5.** In your experience, what **type of trees** do ranchers prefer? (*Check all that apply*)

- |                                             |                                                       |
|---------------------------------------------|-------------------------------------------------------|
| <input type="checkbox"/> Fast growing trees | <input type="checkbox"/> Trees with beautiful flowers |
| <input type="checkbox"/> Fruit trees        | <input type="checkbox"/> Nitrogen fixing trees        |
| <input type="checkbox"/> Timber trees       | <input type="checkbox"/> Shade trees                  |
| <input type="checkbox"/> Native trees       | <input type="checkbox"/> Trees that attract wildlife  |

Other: \_\_\_\_\_

**C6.** In your experience, what are the **main barriers** preventing ranchers from implementing more environmental protection actions? (*Check all that apply*)

- |                                                                      |                                                              |
|----------------------------------------------------------------------|--------------------------------------------------------------|
| <input type="checkbox"/> High cost of inputs (trees, wire, etc.)     | <input type="checkbox"/> High maintenance requirements       |
| <input type="checkbox"/> High mortality of planted trees             | <input type="checkbox"/> Labor shortage                      |
| <input type="checkbox"/> Fear of reduced productivity                | <input type="checkbox"/> Fear of restrictions for harvesting |
| <input type="checkbox"/> Lack of information or technical assistance | <input type="checkbox"/> Not considered important            |

Other: \_\_\_\_\_

**C7.** In your experience, which **incentives** would most effectively motivate ranchers to implement more environmental protection actions? (*Pick maximum 3*)

- In-kind donations (trees, wire, fertilizer)
- Help with labor
- Help with tree maintenance after planting
- Help with fence maintenance once installed
- Payment for ecosystem services (water, carbon, biodiversity, etc.)
- Tax breaks
- Better market prices for sustainable production
- More technical assistance on specific topics
- None, they are not interested

Other: \_\_\_\_\_

**C8.** What proportion of your ranchers would you describe as...?

**A** = most      **B** = more than half      **C** = about half      **D** = less than half      **E** = very few

| <b>Ranchers who:</b>                                              | <b>Proportion</b> |   |   |   |   |
|-------------------------------------------------------------------|-------------------|---|---|---|---|
|                                                                   | A                 | B | C | D | E |
| Think the farm looks better with more trees                       | A                 | B | C | D | E |
| Work to leave the farm in better condition for their heirs        | A                 | B | C | D | E |
| Think they cannot produce more and protect the environment        | A                 | B | C | D | E |
| Think trees provide benefits for production                       | A                 | B | C | D | E |
| Feel strong emotional ties to their land                          | A                 | B | C | D | E |
| Think they have no control over soil degradation                  | A                 | B | C | D | E |
| Think environmental protection generates more costs than benefits | A                 | B | C | D | E |
| Think the farm is worth more with protected forests and streams   | A                 | B | C | D | E |

|                                                              |   |   |   |   |   |
|--------------------------------------------------------------|---|---|---|---|---|
| Don't plant trees because they won't be able to harvest them | A | B | C | D | E |
| Want to use agrochemical inputs more responsibly             | A | B | C | D | E |
| Want to reduce their environmental footprint                 | A | B | C | D | E |
| Think they should be paid for protecting the environment     | A | B | C | D | E |
| Are aware of the environmental impact of cattle ranching     | A | B | C | D | E |
| Think long-term when making decisions about the farm         | A | B | C | D | E |
| Express concern about generational relay in their farm       | A | B | C | D | E |

**Section D.**

**Climate change**

**D1.** What proportion of your ranchers express worry about **climate change**?

- Majority                       Many                       Some                       Very few

**D2.** Which **changes** related to climate to ranchers bring up most frequently? (*Check all that apply*)

- Higher than normal temperatures                       Lower than normal temperatures  
 Shorter than normal rainy season                       Longer than normal rainy season  
 Shorter than normal dry season                       Longer than normal dry season  
 More intense or torrential rains                       More severe droughts  
 Increasingly unpredictable weather

Other: \_\_\_\_\_

**D3.** In general, how do ranchers characterize the **impact** of climate change on their productive activity?

- Very negative     Somewhat negative     Neutral     Somewhat positive     Very positive

**Section E.**

**Technical assistance and capacity building**

**E1.** In your work with ranchers, how much **importance** do you assign to the following topics related to environmental protection?

|                                                      | High                     | Medium                   | Low                      |
|------------------------------------------------------|--------------------------|--------------------------|--------------------------|
| Protecting or recovering forest fragments            | <input type="checkbox"/> | <input type="checkbox"/> | <input type="checkbox"/> |
| Protecting or reforesting of riparian corridors      | <input type="checkbox"/> | <input type="checkbox"/> | <input type="checkbox"/> |
| Increasing the amount of tree cover in the landscape | <input type="checkbox"/> | <input type="checkbox"/> | <input type="checkbox"/> |
| Protecting and recovering soils                      | <input type="checkbox"/> | <input type="checkbox"/> | <input type="checkbox"/> |
| Protecting wild plants and animals                   | <input type="checkbox"/> | <input type="checkbox"/> | <input type="checkbox"/> |
| Using agrochemical inputs rationally                 | <input type="checkbox"/> | <input type="checkbox"/> | <input type="checkbox"/> |
| Incorporating native species                         | <input type="checkbox"/> | <input type="checkbox"/> | <input type="checkbox"/> |

E2. Rate the level of training you have received from the Project on the following topics:

| Topic                                               | Sufficient               | Some                     | Insufficient             | None                     |
|-----------------------------------------------------|--------------------------|--------------------------|--------------------------|--------------------------|
| Silvopastoral systems, establishment and management | <input type="checkbox"/> | <input type="checkbox"/> | <input type="checkbox"/> | <input type="checkbox"/> |
| Biological diversity and productivity               | <input type="checkbox"/> | <input type="checkbox"/> | <input type="checkbox"/> | <input type="checkbox"/> |
| Tree-planting and maintenance                       | <input type="checkbox"/> | <input type="checkbox"/> | <input type="checkbox"/> | <input type="checkbox"/> |
| Micro-catchment and riparian corridor protection    | <input type="checkbox"/> | <input type="checkbox"/> | <input type="checkbox"/> | <input type="checkbox"/> |
| Environmental impacts of cattle production          | <input type="checkbox"/> | <input type="checkbox"/> | <input type="checkbox"/> | <input type="checkbox"/> |
| Restoration in grazing landscapes                   | <input type="checkbox"/> | <input type="checkbox"/> | <input type="checkbox"/> | <input type="checkbox"/> |
| Native species                                      | <input type="checkbox"/> | <input type="checkbox"/> | <input type="checkbox"/> | <input type="checkbox"/> |
| Strategies to improve landscape connectivity        | <input type="checkbox"/> | <input type="checkbox"/> | <input type="checkbox"/> | <input type="checkbox"/> |
| Animal management and nutrition                     | <input type="checkbox"/> | <input type="checkbox"/> | <input type="checkbox"/> | <input type="checkbox"/> |
| Soil management and conservation                    | <input type="checkbox"/> | <input type="checkbox"/> | <input type="checkbox"/> | <input type="checkbox"/> |
| Climate change and cattle ranching                  | <input type="checkbox"/> | <input type="checkbox"/> | <input type="checkbox"/> | <input type="checkbox"/> |

E3. Are there **other topics** relevant to your work that you think should be included or strengthened during your trainings? \_\_\_\_\_

\_\_\_\_\_

\_\_\_\_\_

Section F.

Gender

F1. During your work as an extension agent, have you perceived any **differences** between working with female and male ranchers? (E.g. preference for particular practices, priorities, receptiveness, interest in environmental issues, etc.) *Explain*

\_\_\_\_\_

\_\_\_\_\_

\_\_\_\_\_

F2. In your experience with the Project, do you think female extension agents face additional challenges to conduct their work? (E.g., credibility issues, receptiveness, interaction with ranchers, etc.) *Explain*

\_\_\_\_\_

\_\_\_\_\_

\_\_\_\_\_

Thanks for your time and participation!
